# Supplementary material for: Sensitive period for rescuing parvalbumin interneurons connectivity and social behavior deficits caused by TSC1 loss
Source: PubMed Central journal article supplement (PMC8209106; doi:10.1038/s41467-021-23939-7), 2021-06-16
Supplement: 41467_2021_23939_MOESM1_ESM.pdf [file 41467_2021_23939_MOESM1_ESM.pdf]

**Sensitive period for rescuing parvalbumin interneurons connectivity and social behavior  
deficits caused by *TSCI* loss**

**Amegandjin<sup>#</sup>, Choudhury<sup>#</sup> et al.**

**Supplementary Table**

| <b>Gene</b> | <b>Name</b>   | <b>Direction</b> | <b>Sequences</b>                        |
|-------------|---------------|------------------|-----------------------------------------|
| TSC1        | F4536         | Fwd              | 5'-AGGAGGCCTCTTCTGCTACC-3'              |
| TSC1        | R4830         | Rev              | 5'-CAGCTCCGACCATGAAGTG-3'               |
| TSC1        | R6548         | Rev              | 5'-TGGGTCCTGACCTATCTCCTA-3'             |
| Nkx2.1Cre   | F1            | Fwd              | 5'-AAGGCGGACTCGGTCCACTCCG-3'            |
| Nkx2.1Cre   | F2            | Fwd              | 5'-TCCTCCAGGGGACTCAAGATG-3'             |
| Nkx2.1Cre   | R1            | Rev              | 5'-TCGGATCCGCCGCATAACCAG-3'             |
| PVCre       | 148-454-Fwd   | Fwd              | 5'-CAGCCTCTGTTCCACATACACTCC-3'          |
| PVCre       | 149-o106m-Fwd | Fwd              | 5'- GCTCAGAGCCTCCATTCCCT-3'             |
| PVCre       | 150-o103m-Rev | Rev              | 5'-TCACTCGAGAGTACCAAGCAGGCAGGAGATATC-3' |
| RCE         | RCE-Rosa1     | Fwd              | 5'-CCCAAAGTCGCTCTGAGTTGTTATC-3'         |
| RCE         | RCE-Rosa2     | Fwd              | 5'-GAAGGAGCGGGAGAAATGGATATG-3'          |
| RCE         | RCE-Cag3      | Rev              | 5'-CCAGGCGGGC CATTACCGTAAG-3'           |

**Supplementary Table 1. List of primers used for mouse genotyping.**

## Supplementary Figures

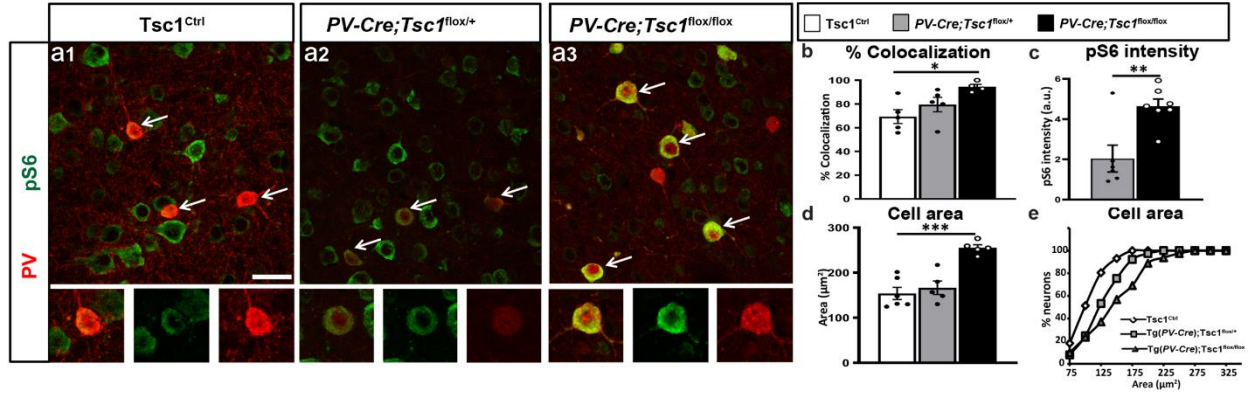

**Supplementary Figure 1. Cortical PV cells show increased mTOR activity and somatic hypertrophy in *PV-Cre;Tsc1<sup>lox/lox</sup>* mice.** **a**, Coronal sections of somatosensory cortex immunostained for PV (red) and pS6 (green) in *Tsc1<sup>Ctrl</sup>* (**a1**), *PV-Cre;Tsc1<sup>lox/+</sup>* (**a2**) and *PV-Cre;Tsc1<sup>lox/lox</sup>* mice (**a3**) at P45. Lower panels show individual PV cells. **b**, *PV-Cre;Tsc1<sup>lox/lox</sup>* mice show increased percentage of colocalization of pS6 in PV cells (One-way ANOVA, \* $p=0.0254$ ; Holm-Sidak's multiple comparisons: *Tsc1<sup>Ctrl</sup>* vs *PV-Cre;Tsc1<sup>lox/+</sup>*  $p=0.1929$ ; *Tsc1<sup>Ctrl</sup>* vs *PV-Cre;Tsc1<sup>lox/lox</sup>* \* $p=0.0239$ ). Number of mice: *Tsc1<sup>Ctrl</sup>*  $n=5$ , *PV-Cre;Tsc1<sup>lox/+</sup>*  $n=5$ , *PV-Cre;Tsc1<sup>lox/lox</sup>*  $n=4$ . **c**, Quantification of pS6 expression intensity in PV cells normalized to wild-type controls show two-fold increase in *PV-Cre;Tsc1<sup>lox/lox</sup>* mice (Welch's t-test \*\* $p=0.0093$ ). Number of mice: *PV-Cre;Tsc1<sup>lox/+</sup>*  $n=6$ , *PV-Cre;Tsc1<sup>lox/lox</sup>*  $n=7$ . **d**, **e**, PV cells show somatic hypertrophy in homozygous mutant mice. **d** (One-way ANOVA, \*\*\* $p=0.0001$ ; Dunnett's multiple comparisons: *Tsc1<sup>Ctrl</sup>* vs *PV-Cre;Tsc1<sup>lox/+</sup>*  $p=0.7005$ ; *Tsc1<sup>Ctrl</sup>* vs *PV-Cre;Tsc1<sup>lox/lox</sup>* \*\*\* $p=0.0001$ ). Number of mice: *Tsc1<sup>Ctrl</sup>*  $n=6$ , *PV-Cre;Tsc1<sup>lox/+</sup>*  $n=5$ , *PV-Cre;Tsc1<sup>lox/lox</sup>*  $n=5$ . **e**, Cumulative distribution (K-S test, \* $p<0.001$ ) at P45. Scale bar, 20  $\mu\text{m}$ . Data represent mean  $\pm$  SEM.

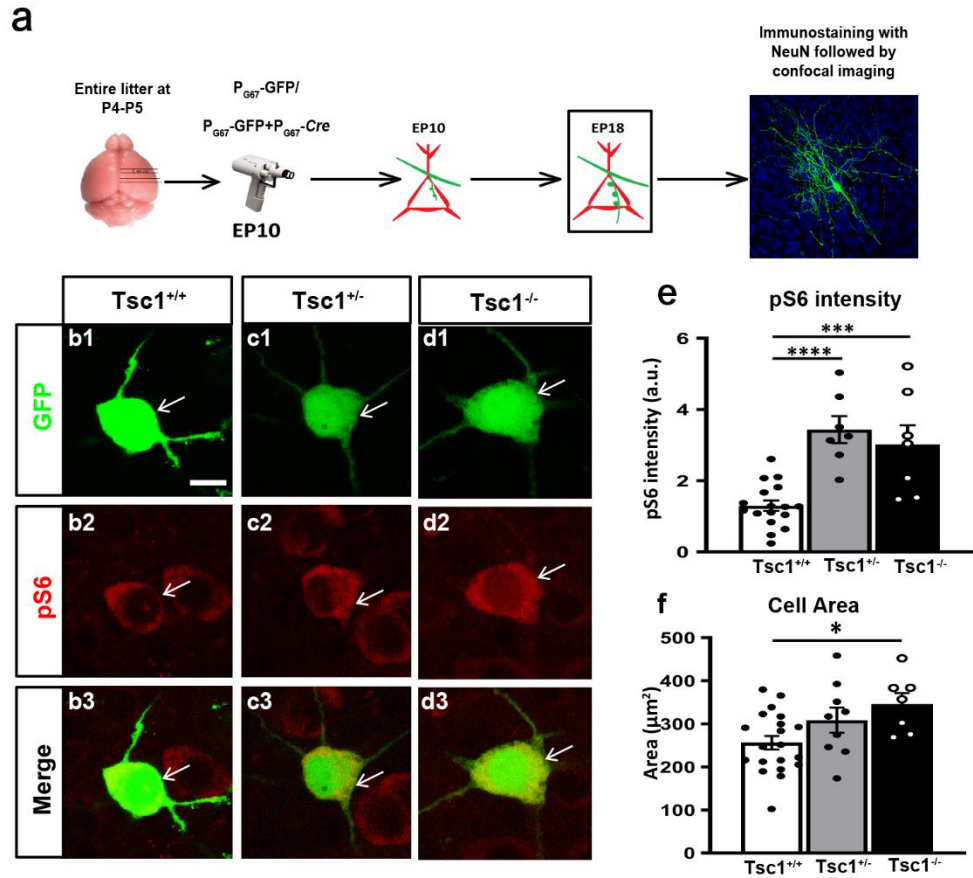

**Supplementary Figure 2. *Tsc1* knockout in single PV cells leads to increase in mTOR activity and somatic hypertrophy.** **a**, Schematics of experimental procedure. **b-d**, PV cells from cortical organotypic cultures transfected with P<sub>G67</sub> (**b**, *Tsc1*<sup>+/+</sup> control cells) or P<sub>G67</sub>-Cre (**c**, *Tsc1*<sup>+/-</sup> and **d**, *Tsc1*<sup>-/-</sup>) at EP10 (P5+5 days *in vitro*=Equivalent Postnatal day 10) and immunostained for pS6 (red) at EP18 (P5+13 days *in vitro*=Equivalent Postnatal day 18). **e**, Somatic pS6 intensity is increased in both *Tsc1*<sup>+/-</sup> and *Tsc1*<sup>-/-</sup> PV cells compared to *Tsc1*<sup>+/+</sup> PV cells (One-way ANOVA, \*\*\*\*p<0.0001; Holm-Sidak's multiple comparisons: *Tsc1*<sup>+/+</sup> vs *Tsc1*<sup>+/-</sup> \*\*\*\*p<0.0001; *Tsc1*<sup>+/+</sup> vs *Tsc1*<sup>-/-</sup> \*\*\*p=0.0003). Number of cells: *Tsc1*<sup>+/+</sup> n = 17, *Tsc1*<sup>+/-</sup> n=7, *Tsc1*<sup>-/-</sup> n=7. **f**, *Tsc1*<sup>-/-</sup> cells have increased soma area (One-way ANOVA, \*p=0.0213; Holm-Sidak's multiple comparisons: *Tsc1*<sup>+/+</sup> vs *Tsc1*<sup>+/-</sup> p=0.1675; *Tsc1*<sup>+/+</sup> vs *Tsc1*<sup>-/-</sup> \*p=0.0277). Number of transfected cells: *Tsc1*<sup>+/+</sup> n=20, *Tsc1*<sup>+/-</sup> n=9, *Tsc1*<sup>-/-</sup> n=7. Scale bar, 10µm. Data represent mean ± SEM.

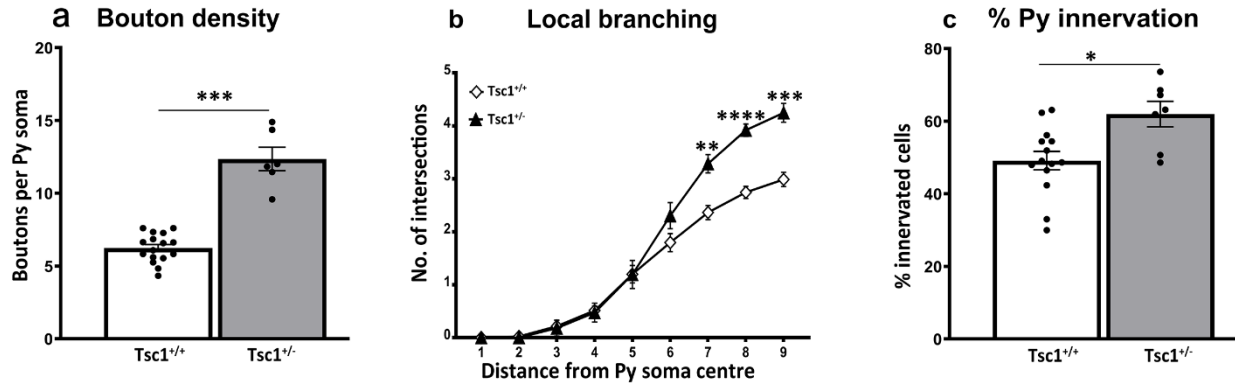

**Supplementary Figure 3. *Tsc1* haploinsufficiency in single PV cells causes a premature increase in axon terminal branching and bouton density.** **a**, PV cells lacking one allele of *Tsc1* show increase in bouton density (Welch's t-test, \*\*\* $p=0.0004$ ), number of PV cells:  $n=16$  for *Tsc1<sup>+/+</sup>*,  $n=6$  for *Tsc1<sup>+/-</sup>* and local branching (**b**) (Welch's t-test, \*\* $p=0.0014$  (radius7), \*\*\*\* $p<0.0001$  (radius8), \*\*\* $p=0.0001$  (radius9)), number of PV cells:  $n=15$  for *Tsc1<sup>+/+</sup>*,  $n=6$  for *Tsc1<sup>+/-</sup>*. **c**, Percentage of innervated cells (Welch's t-test, \* $p=0.0114$ ). Number of PV cells:  $n=14$  *Tsc1<sup>+/+</sup>*,  $n=7$  *Tsc1<sup>+/-</sup>*. Data represent mean  $\pm$  SEM.

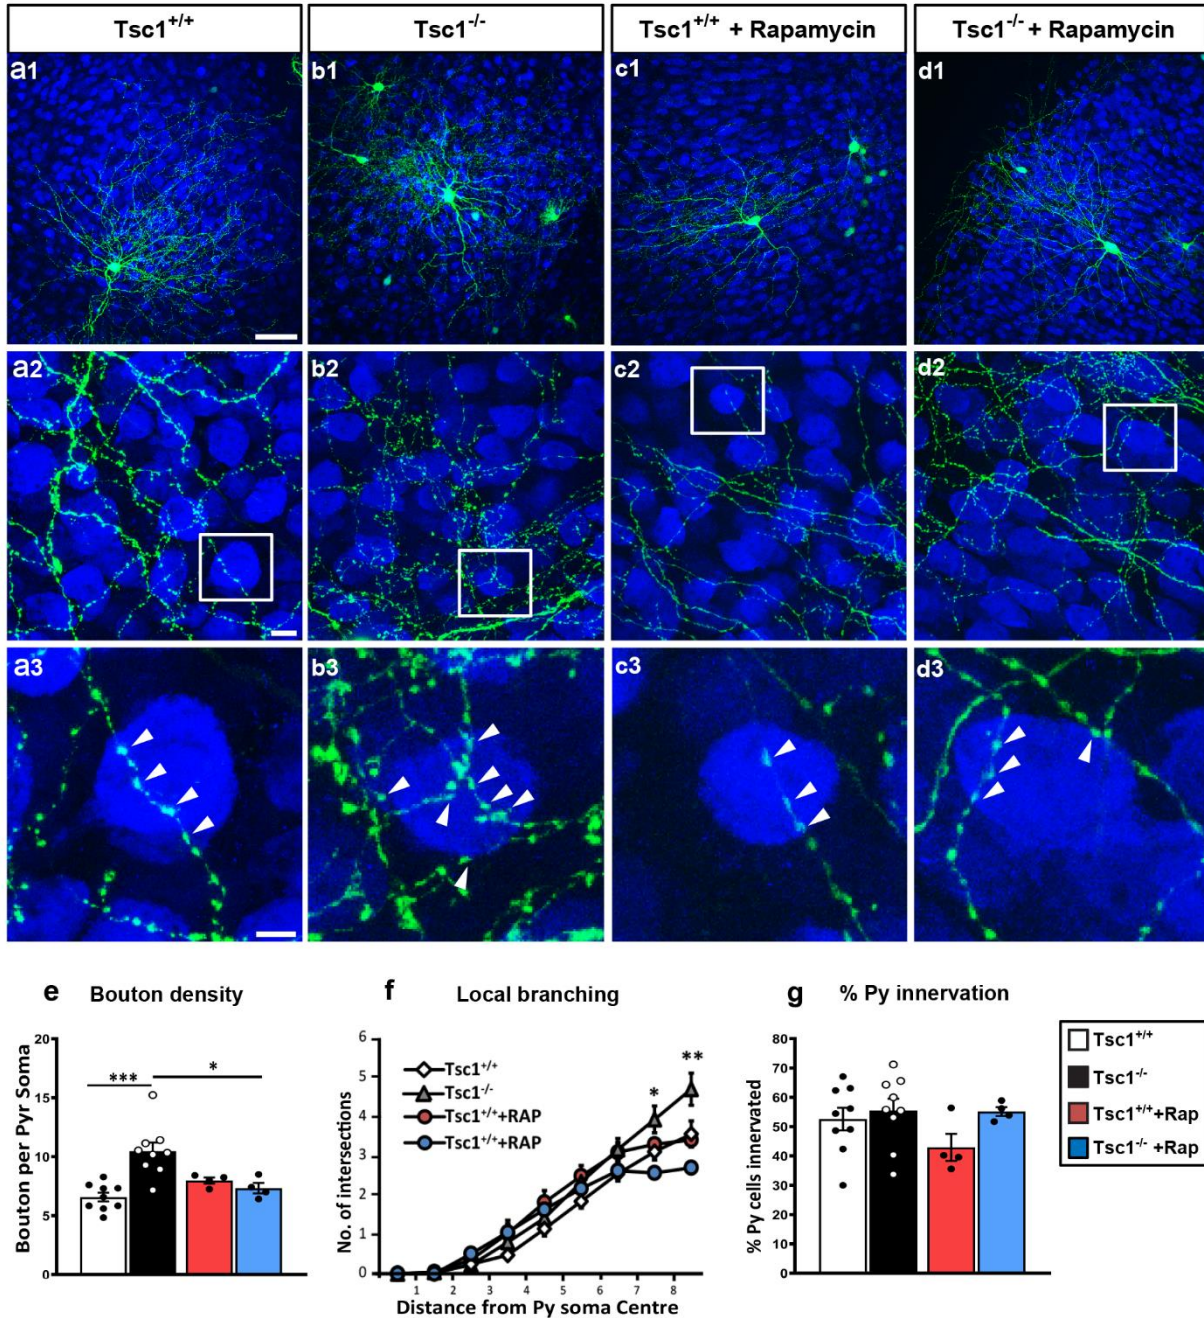

**Supplementary Figure 4. Premature increase in perisomatic innervation by  $Tsc1^{-/-}$  PV cells is mTORC1 dependent.** **a, b**,  $Tsc1^{-/-}$  PV cell (green) shows more complex terminal axonal branching (**a2, b2**) and increased bouton density at EP18 (**a3, b3**, arrowheads) compared to control, age-matched PV cells. **c, d**, Rapamycin treatment from EP12-18 does not affect bouton density and local branching of  $Tsc1^{+/+}$  PV cells (**c**), while it normalizes perisomatic innervations formed by  $Tsc1^{-/-}$  PV cells (**d**).  $Tsc1^{-/-}$  PV cells show increased bouton density (**e**) (Two-way ANOVA,  $F_{\text{treatment}}(1, 22)=1.763$   $p=0.1979$ ,  $F_{\text{genotype}}(1, 22)=6.165$   $p=0.0211$ ,  $F_{\text{genotype*treatment}}(1,$

22)=12.05 p=0.0022; \*p=0.0129, \*\*\*p=0.0001; Tukey's multiple comparisons test; number of PV cells: n=9 *Tsc1<sup>+/+</sup>*, n=9 *Tsc1<sup>-/-</sup>*, n=4 *Tsc1<sup>+/+</sup>* + Rapamycin, n=4 *Tsc1<sup>-/-</sup>* + Rapamycin) and local branching (**f**) (Two-way ANOVA,  $F_{\text{radius}}$  (1.532, 16.85)=42.94 p<0.0001,  $F_{\text{Treatment}}$ (3, 11)=0.9657 p=0.4433,  $F_{\text{genotype}}$ (11, 88)=22.27 p<0.0001,  $F_{\text{radius*treatment}}$  (24, 88)=1.521 p=0.0820; \*p<0.05, \*\*p<0.001; Bonferroni's multiple comparisons test; number of PV cells: n=4 *Tsc1<sup>+/+</sup>*, n=3 *Tsc1<sup>-/-</sup>*, n=4 *Tsc1<sup>+/+</sup>* + Rapamycin, n=4 *Tsc1<sup>-/-</sup>* + Rapamycin;) compared to the other groups. **g**, Percentage of innervation (Two-way ANOVA,  $F_{\text{treatment}}$  (1, 22)=1.207 p=0.2837,  $F_{\text{genotype}}$  (1, 22)=2.782 p=0.1095,  $F_{\text{genotype*treatment}}$  (1, 22)=1.049 p=0.3168; number of PV cells: n=9 *Tsc1<sup>+/+</sup>*, n=9 *Tsc1<sup>-/-</sup>*, n=4 *Tsc1<sup>+/+</sup>* + Rapamycin, n=4 *Tsc1<sup>-/-</sup>* + Rapamycin). Scale bars: **a1-d1**, 100  $\mu\text{m}$ ; **a2-d2** and **a3-d3**, 5  $\mu\text{m}$ . Data represent mean  $\pm$  SEM.



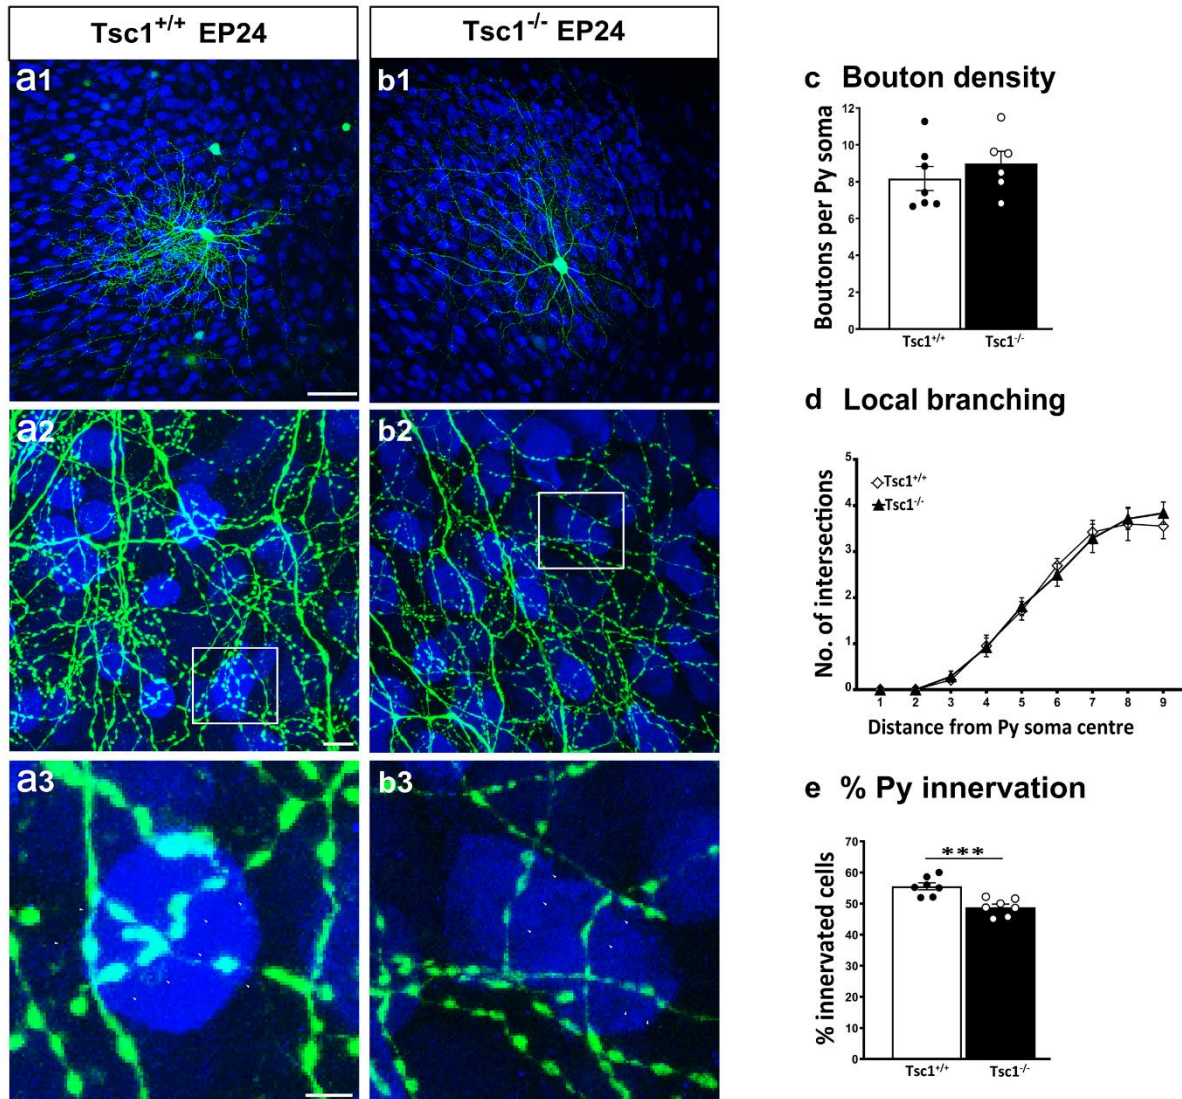

**Supplementary Figure 5. PV  $Tsc1^{-/-}$  cell innervations at EP24 are morphologically indistinguishable from age-matched controls. a1,  $Tsc1^{+/+}$  and b1,  $Tsc1^{-/-}$  PV cells show similar axonal branching (a2, b2) and perisomatic bouton density (a3, b3, arrowheads). c, Bouton density (Welch's t test,  $p=0.3920$ ; Number of PV cells:  $n=7$   $Tsc1^{+/+}$ ,  $n=6$   $Tsc1^{-/-}$ ). d, local branching is not significantly different between the two groups (Number of PV cells:  $n=5$   $Tsc1^{+/+}$ ,  $n=6$   $Tsc1^{-/-}$ ). e, percentage of innervation is significantly reduced in the  $Tsc1^{-/-}$  PV cells (Welch's t test,  $***p=0.0009$ ; Number of PV cells:  $n=7$   $Tsc1^{+/+}$ ,  $n=7$   $Tsc1^{-/-}$ ). Scale bars: a1-b1, 50  $\mu\text{m}$ ; a2-b2, 10  $\mu\text{m}$ , a3-b3, 5  $\mu\text{m}$ . Data represent mean  $\pm$  SEM.**



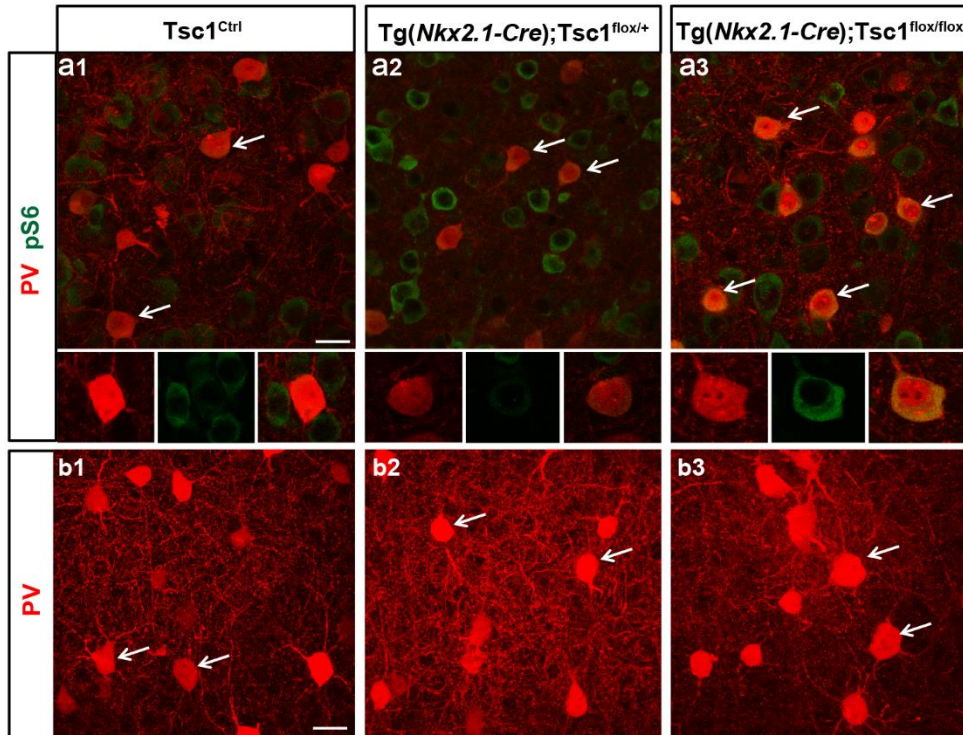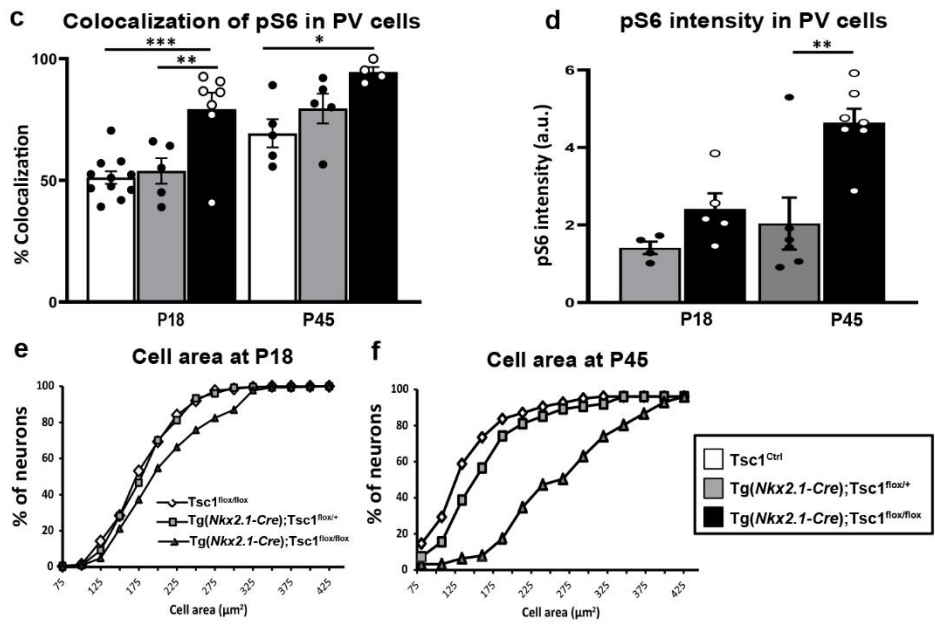

**Supplementary Figure 6. Cortical PV cells from *Tg(Nkx2.1-Cre);Tsc1<sup>flox/flox</sup>* mice show increased mTOR activity and somatic hypertrophy.** a, Coronal sections of somatosensory cortex immunostained for PV (red) and pS6 (green) (a) or PV only (b) in *Tsc1<sup>Ctrl</sup>* (a1, b1), *Tg(Nkx2.1-Cre);Tsc1<sup>flox/+</sup>* (a2, b2) and *Tg(Nkx2.1-Cre);Tsc1<sup>flox/flox</sup>* mice (a3, b3) at P18. Lower panels show higher magnification of individual PV cells. c, In *Tg(Nkx2.1-Cre);Tsc1<sup>flox/flox</sup>* mice, more PV cells co-localize with pS6 as compared to *Tg(Nkx2.1-Cre);Tsc1<sup>flox/+</sup>* and wild-type mice

at P18 (One-way ANOVA, \*\*\* $p=0.0005$ ; Tukey's multiple comparison test:  $Tsc1^{Ctrl}$  vs  $Tg(Nkx2.1-Cre);Tsc1^{flox/+}$   $p=0.9154$ ;  $Tsc1^{Ctrl}$  vs  $Tg(Nkx2.1-Cre);Tsc1^{flox/flox}$  \*\*\* $p=0.0005$ ;  $Tg(Nkx2.1-Cre);Tsc1^{flox/+}$  vs  $Tg(Nkx2.1-Cre);Tsc1^{flox/flox}$  \*\* $p=0.0072$ ) and at P45 (One-way ANOVA, \* $p=0.0254$ ; Tukey's multiple comparison test:  $Tsc1^{Ctrl}$  vs  $Tg(Nkx2.1-Cre);Tsc1^{flox/+}$   $p=0.3805$ ;  $Tsc1^{Ctrl}$  vs  $Tg(Nkx2.1-Cre);Tsc1^{flox/flox}$  \* $p=0.0202$ ;  $Tg(Nkx2.1-Cre);Tsc1^{flox/+}$   $Tsc1^{Ctrl}$  vs  $Tg(Nkx2.1-Cre);Tsc1^{flox/flox}$  \*\*\* $p=0.1789$ ). Number of mice at P18  $Tsc1^{Ctrl}$   $n=11$ ,  $Tg(Nkx2.1-Cre);Tsc1^{flox/+}$   $n=5$ ,  $Tg(Nkx2.1-Cre);Tsc1^{flox/flox}$   $n=7$ ; number of mice at P45,  $Tsc1^{Ctrl}$   $n=5$ ,  $Tg(Nkx2.1-Cre);Tsc1^{flox/+}$   $n=5$ ,  $Tg(Nkx2.1-Cre);Tsc1^{flox/flox}$   $n=4$ . **d**, pS6 expression intensity in PV cells normalized to wild-type controls at P18 (Welch's t-test  $p=0.06$ ; number of mice at P18,  $Tg(Nkx2.1-Cre);Tsc1^{flox/+}$   $n=4$ ,  $Tg(Nkx2.1-Cre);Tsc1^{flox/flox}$   $n=5$ ) and at P45 (Welch's t-test \*\* $p=0.0093$ ; number of mice at P45,  $Tg(Nkx2.1-Cre);Tsc1^{flox/+}$   $n=6$ ,  $Tg(Nkx2.1-Cre);Tsc1^{flox/flox}$   $n=7$ ). **e, f**, Quantification of PV cell area shows somatic hypertrophy in  $Tg(Nkx2.1-Cre);Tsc1^{flox/flox}$  mice at both P18 and P45 (P18: K-S test, \* $p<0.01$ ; P45: K-S test, \* $p<0.001$ ), and in  $Tg(Nkx2.1-Cre);Tsc1^{flox/+}$  mice at P45 (P18: K-S test, \* $p<0.05$ ),  $n=11$   $Tsc1^{Ctrl}$  mice,  $n=5$   $Tg(Nkx2.1-Cre);Tsc1^{flox/+}$  mice,  $n=7$   $Tg(Nkx2.1-Cre);Tsc1^{flox/flox}$  mice at P18,  $n=6$  mice for all genotypes at P45. Scale bar, 20  $\mu$ m. Data represent mean  $\pm$  SEM.

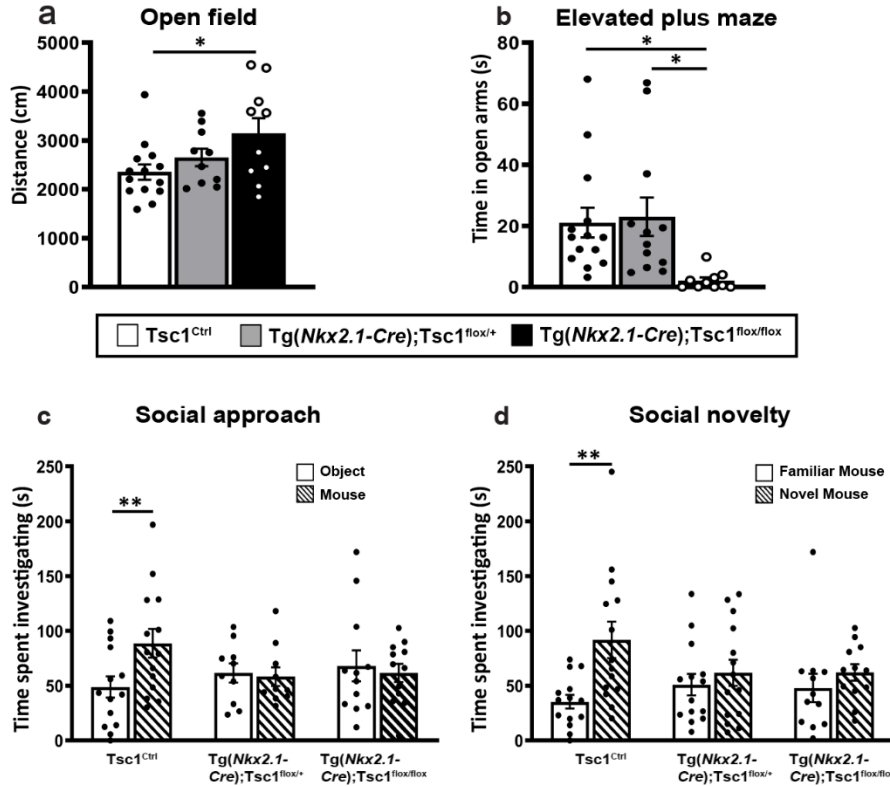

**Supplementary Figure 7. *Tsc1* knockout in MGE derived neurons leads to social behavioral deficits in young adult mice.** **a**, Open field test: Quantification of distance travelled during exploratory activity in an open field arena at P33 shows increased exploratory drive in *Tg(Nkx2.1-Cre);Tsc1*<sup>flox/flox</sup> mice (One-way ANOVA, \* $p < 0.0407$ ; Holm-Sidak's multiple comparisons: *Tsc1*<sup>Ctrl</sup> vs *Tg(Nkx2.1-Cre);Tsc1*<sup>flox/+</sup>  $p = 0.3246$ ; *Tsc1*<sup>Ctrl</sup> vs *Tg(Nkx2.1-Cre);Tsc1*<sup>flox/flox</sup> \* $p = 0.0241$ ). Number of mice: *Tsc1*<sup>Ctrl</sup>  $n = 14$ , *Tg(Nkx2.1-Cre);Tsc1*<sup>flox/+</sup>  $n = 10$ , *Tg(Nkx2.1-Cre);Tsc1*<sup>flox/flox</sup>  $n = 10$ . **b**, Elevated plus maze: Quantification of time spent in the open arms of elevated plus maze arena at P35 shows increased anxiety like behavior in *Tg(Nkx2.1-Cre);Tsc1*<sup>flox/flox</sup> mice (One-way ANOVA, \* $p = 0.0137$ ; Tukey's multiple comparisons test: *Tsc1*<sup>Ctrl</sup> vs *Tg(Nkx2.1-Cre);Tsc1*<sup>flox/+</sup>  $p = 0.7755$ ; *Tsc1*<sup>Ctrl</sup> vs *Tg(Nkx2.1-Cre);Tsc1*<sup>flox/flox</sup> \* $p = 0.0230$ ). Number of mice: *Tsc1*<sup>Ctrl</sup>  $n = 14$ , *Tg(Nkx2.1-Cre);Tsc1*<sup>flox/+</sup>  $n = 12$ , *Tg(Nkx2.1-Cre);Tsc1*<sup>flox/flox</sup>  $n = 10$ . **c**, In the 3 chambers, both *Tg(Nkx2.1-Cre);Tsc1*<sup>flox/+</sup> and *Tg(Nkx2.1-Cre);Tsc1*<sup>flox/flox</sup> mice do not show preference for the mouse vs the object (Two-way ANOVA,  $F_{\text{genotype}}(2, 33) = 0.2257$   $p = 0.7992$ ,  $F_{\text{time}}(1, 33) = 1.842$   $p = 0.1840$ ,  $F_{\text{genotype*time}}(2, 33) = 4.460$   $p = 0.0193$ ; \*\* $p = 0.0055$ , Sidak's multiple comparisons test). Number of mice: *Tsc1*<sup>Ctrl</sup>  $n = 14$ , *Tg(Nkx2.1-Cre);Tsc1*<sup>flox/+</sup>  $n = 10$ , *Tg(Nkx2.1-Cre);Tsc1*<sup>flox/flox</sup>  $n = 12$ . **d**, Unlike *Tsc1*<sup>Ctrl</sup> mice, both *Tg(Nkx2.1-Cre);Tsc1*<sup>flox/+</sup> and *Tg(Nkx2.1-Cre);Tsc1*<sup>flox/flox</sup> mice failed to show preference for social novelty (Two-way ANOVA,  $F_{\text{genotype}}(2, 37) = 0.2907$   $p = 0.7494$ ,  $F_{\text{time}}(1, 37) = 9.499$   $p = 0.0039$ ,  $F_{\text{genotype*time}}(2, 37) = 2.877$   $p = 0.0690$ ; \*\* $p = 0.0016$ , Sidak's multiple comparisons test). Number of mice: *Tsc1*<sup>Ctrl</sup>  $n = 14$ , *Tg(Nkx2.1-Cre);Tsc1*<sup>flox/+</sup>  $n = 14$ , *Tg(Nkx2.1-Cre);Tsc1*<sup>flox/flox</sup>  $n = 12$ . Data represent mean  $\pm$  SEM.

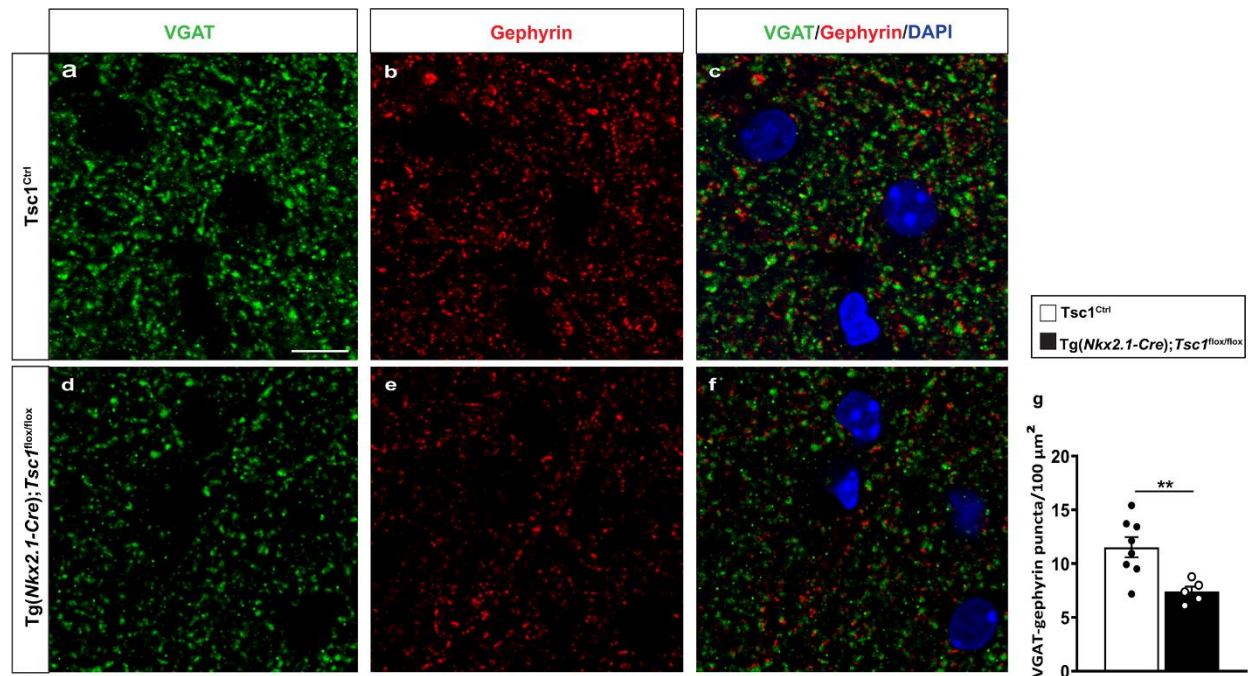

**Supplementary Figure 8. *Tsc1* knockout in MGE-derived neurons leads to a significant reduction of GABAergic synapses in the olfactory bulb of adult mice. (a-f)** Horizontal sections of adult mouse olfactory bulb stained for VGAT (green); gephyrin (red) and DAPI (blue). **(g)** Quantification of VGAT/Gephyrin shows a decrease of colocalized puncta (Welch's t test, \*\* $p=0.003$ ). Number of mice: *Tsc1<sup>Ctrl</sup>*  $n = 8$ , *Tg(Nkx2.1-Cre);Tsc1<sup>flox/flox</sup>*  $n = 5$ . Scale bar: 10μm. Data represent mean  $\pm$  SEM.



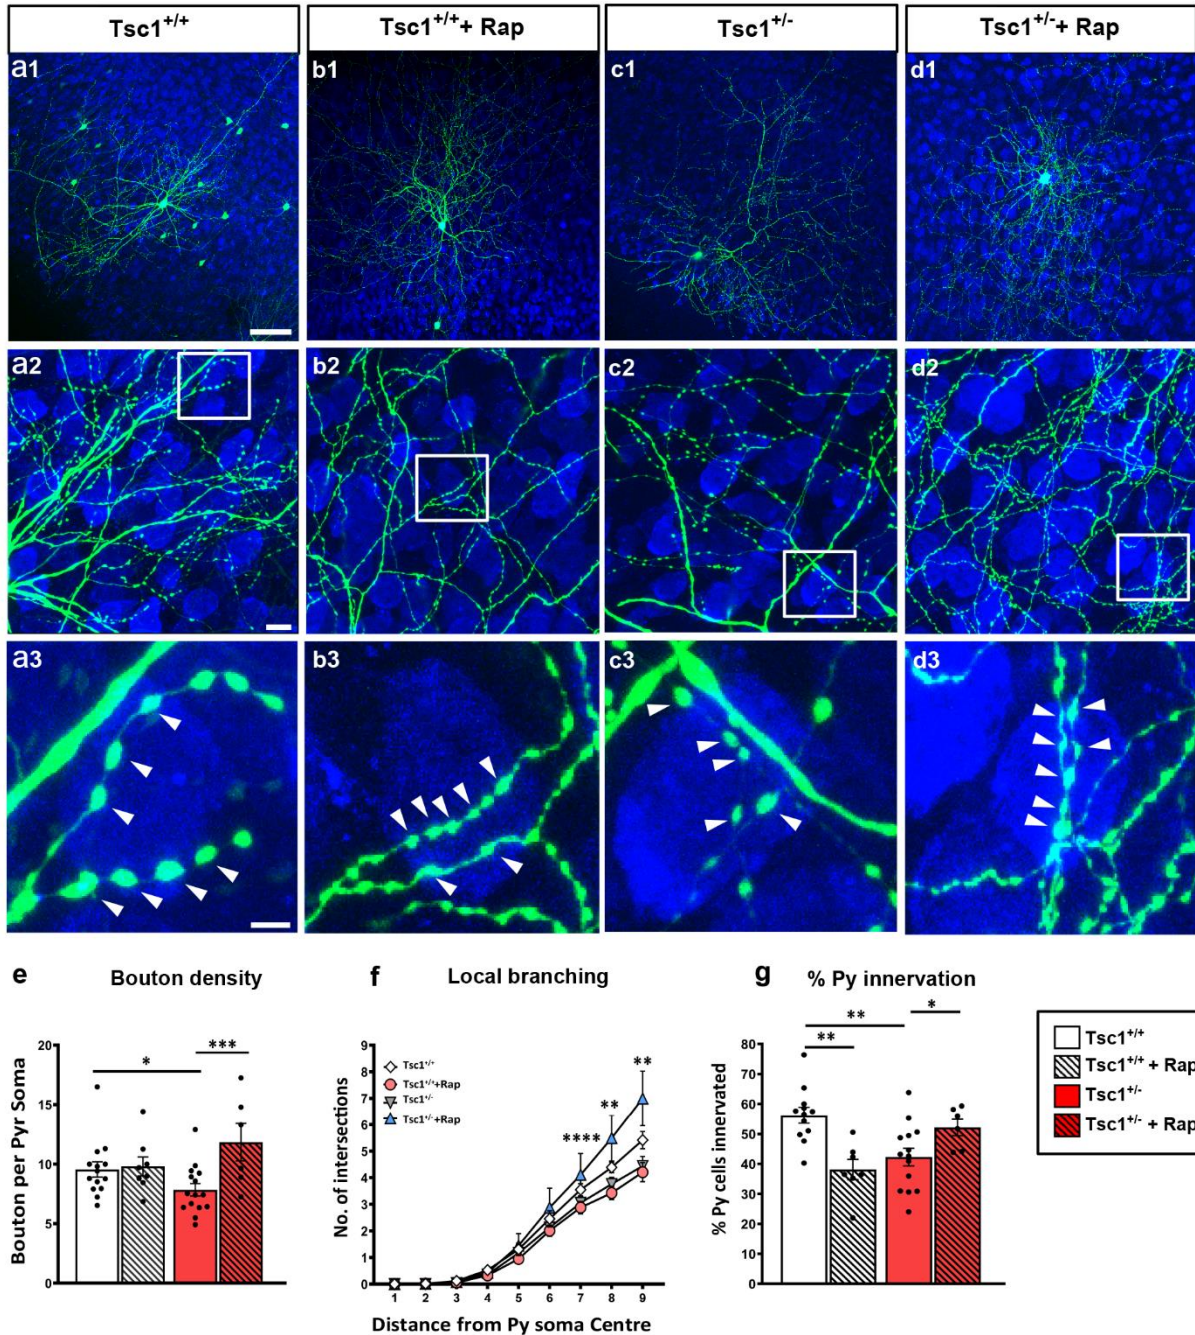

**Supplementary Figure 9. Short term Rapamycin treatment rescues loss of perisomatic innervation in  $Tg(Nkx2.1-Cre);Tsc1^{lox/+}$  mice at EP34.** **a, b**, PV cell (green) among NeuN immunostained neurons (blue) in cortical organotypic cultures from  $Tsc1^{Ctrl}$  mouse at EP34 where **b** is treated with Rapamycin. **c, d**, PV cells from  $Tg(Nkx2.1-Cre);Tsc1^{lox/+}$  where **d** is treated with Rapamycin. **e**, Loss of bouton density in PV cells from  $Tg(Nkx2.1-Cre);Tsc1^{lox/+}$  mice is reversed by Rapamycin treatment (Two-way ANOVA,  $F_{treatment} (1, 39)=0.04043$   $p=0.8417$ ,  $F_{genotype} (1, 39)=6.755$   $p=0.0131$ ,  $F_{genotype*treatment} (1, 39)=5.252$   $p=0.0274$ ; \* $p<0.05$ , \*\* $p<0.001$ ; Bonferroni's multiple comparisons test); PV cells:  $n=14$   $Tsc1^{Ctrl}$ ,  $n=14$   $Tg(Nkx2.1-Cre);Tsc1^{lox/+}$ ,  $n=8$   $Tsc1^{Ctrl}$



+ Rapamycin, n=6 Tg(*Nkx2.1-Cre*); *Tsc1<sup>flox/+</sup>* + Rapamycin. Similarly, loss of local branching in PV cells from Tg(*Nkx2.1-Cre*);*Tsc1<sup>flox/+</sup>* mice is reversed by Rapamycin treatment (**f**) (Two-way ANOVA,  $F_{\text{radius}}$  (1.991, 77.65)=308  $p<0.0001$ ,  $F_{\text{Treatment}}$ (3, 39)=4.296  $p=0.0103$ ,  $F_{\text{genotype}}$ (39, 312)=4.579  $p<0.0001$ ,  $F_{\text{radius*treatment}}$  (24, 312)=3.118  $p<0.0001$ , \*\* $p<0.001$ , \*\*\* $p<0.001$ ; Bonferroni's multiple comparisons test); PV cells: n=14 *Tsc1<sup>Ctrl</sup>*, n=15 Tg(*Nkx2.1-Cre*);*Tsc1<sup>flox/+</sup>*, n=8 *Tsc1<sup>Ctrl</sup>* + Rapamycin, n=6 Tg(*Nkx2.1-Cre*);*Tsc1<sup>flox/+</sup>* + Rapamycin. **g**, Rapamycin treatment reverses the loss of percentage of innervation in mutant PV cells, while it leads to significant loss of innervation in PV cells from *Tsc1<sup>Ctrl</sup>* mice (Two-way ANOVA,  $F_{\text{genotype}}$  (1, 35)=0.0002  $p=0.9883$ ,  $F_{\text{treatment}}$  (1, 35)=1.583  $p=0.2167$ ,  $F_{\text{genotype*treatment}}$  (1, 35)=18.49  $p=0.0001$ , \* $p<0.05$ , \*\* $p<0.001$ ; Bonferroni's multiple comparisons tes). Arrowheads indicate boutons. PV cells: n=12 *Tsc1<sup>Ctrl</sup>*, n=14 Tg(*Nkx2.1-Cre*);*Tsc1<sup>flox/+</sup>*, n=7 *Tsc1<sup>Ctrl</sup>* + Rapamycin, n=6 Tg(*Nkx2.1-Cre*);*Tsc1<sup>flox/+</sup>* + Rapamycin. Scale bars: **a1-d1**, 10  $\mu\text{m}$ ; **a2-d2** and **a3-d3**, 5  $\mu\text{m}$ . Data represent mean  $\pm$  SEM.

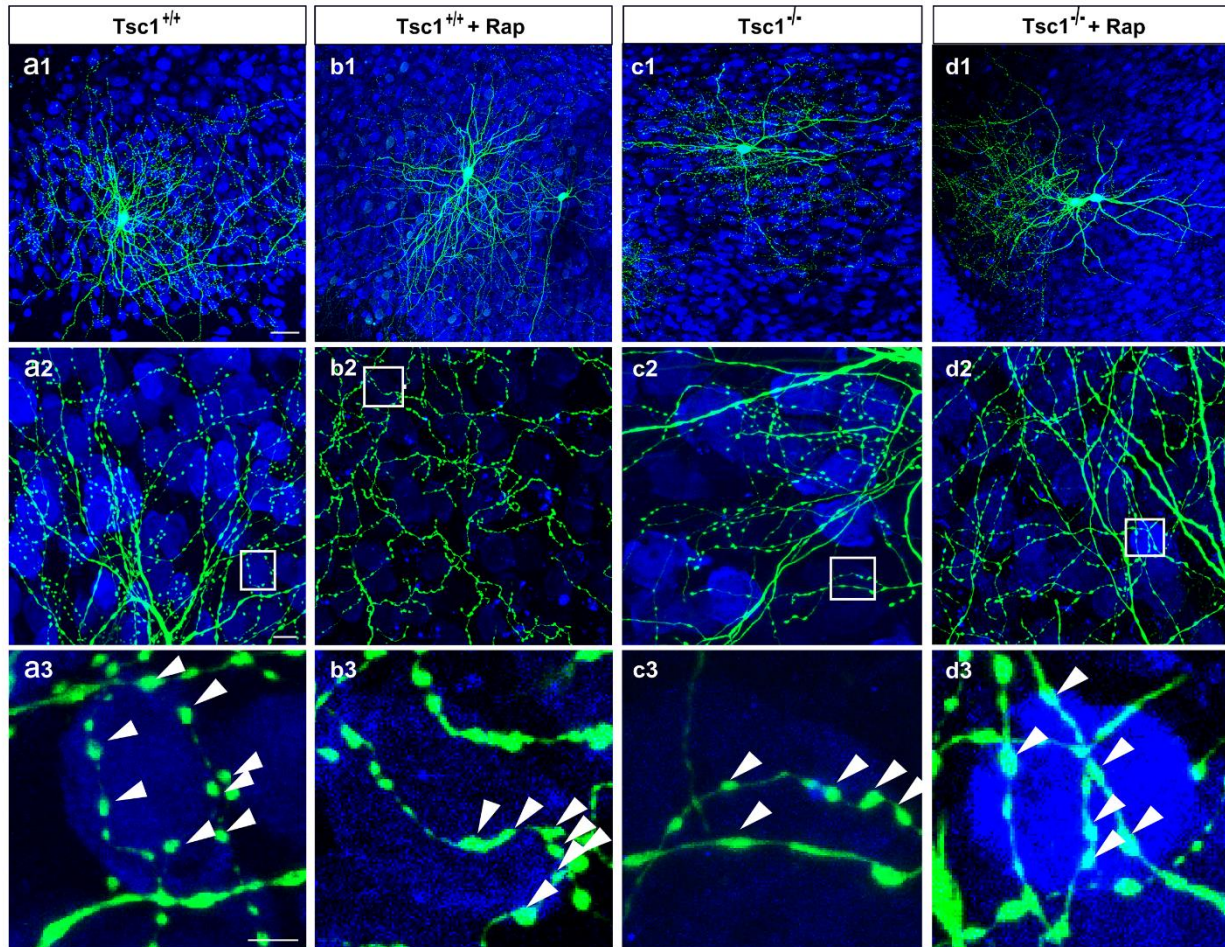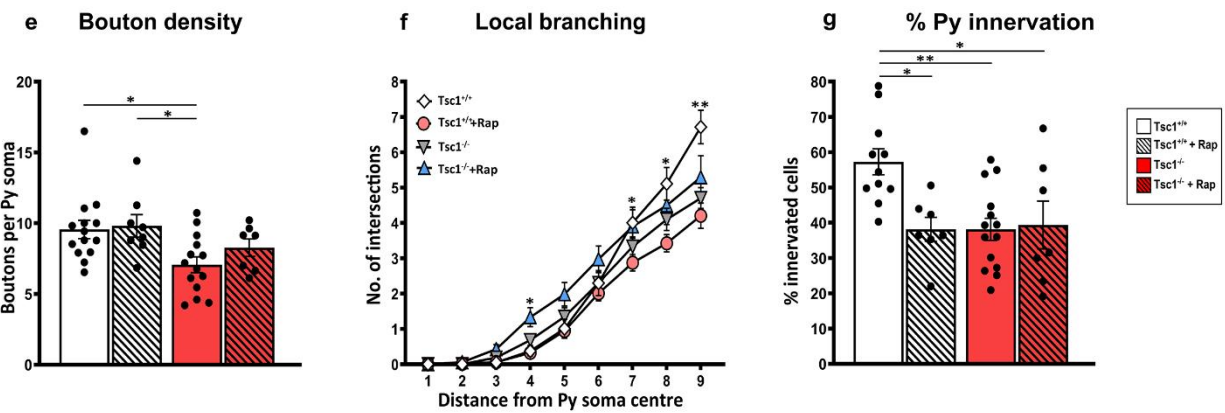

**Supplementary Figure 10. Short term Rapamycin treatment does not rescue loss of perisomatic innervations in  $Tg(Nkx2.1-Cre);Tsc1^{lox/lox}$  mice at EP34. a, b, PV cell (green) among NeuN immunostained neurons (blue) in cortical organotypic cultures from a  $Tsc1^{Ctrl}$  mouse at EP34 where b is treated with Rapamycin. c, d, PV cells from  $Tg(Nkx2.1-Cre);Tsc1^{lox/lox}$  where d is treated with Rapamycin. e, f, Loss of bouton density (e) (Two-way ANOVA,  $F_{treatment} (1, 39)=1.100$   $p=0.3007$ ,  $F_{genotype} (1, 39)=8.473$   $p=0.0059$ ,  $F_{genotype*treatment} (1, 39)=0.4700$   $p=0.4970$ ;**

\* $p < 0.05$ ; Bonferroni's multiple comparisons test; PV cells:  $n = 14 TscI^{Ctrl}$ ,  $n = 14 Tg(Nkx2.1-Cre); TscI^{flox/flox}$ ,  $n = 8 TscI^{Ctrl} + Rapamycin$ ,  $n = 7 Tg(Nkx2.1-Cre); TscI^{flox/flox} + Rapamycin$ ) and terminal branching (**f**) (Two-way ANOVA,  $F_{radius} (8, 304) = 388.7$   $p < 0.0001$ ,  $F_{Treatment} (3, 38) = 2.238$   $p = 0.0995$ ,  $F_{genotype} (38, 304) = 8.573$   $p < 0.0001$ ,  $F_{radius * treatment} (24, 304) = 4.930$   $p < 0.0001$ , Bonferroni's multiple comparisons test \* $p < 0.05$ , \*\* $p < 0.001$ ; PV cells:  $n = 13 TscI^{Ctrl}$ ,  $n = 14 Tg(Nkx2.1-Cre); TscI^{flox/flox}$ ,  $n = 8 TscI^{Ctrl} + Rapamycin$ ,  $n = 7 Tg(Nkx2.1-Cre); TscI^{flox/flox} + Rapamycin$ ) in PV cells from  $Tg(Nkx2.1-Cre); TscI^{flox/flox}$  mice are only partially reversed by Rapamycin treatment. **g**, Loss of percentage of innervation in PV cells from  $Tg(Nkx2.1-Cre); TscI^{flox/flox}$  is not reversed by Rapamycin treatment. Moreover, Rapamycin treatment in  $TscI^{Ctrl}$  mice causes significant loss of innervation (Two-way ANOVA,  $F_{treatment} (1, 35) = 4.422$   $p = 0.0427$ ,  $F_{genotype} (1, 35) = 4.424$   $p = 0.00427$ ,  $F_{genotype * treatment} (1, 35) = 5.720$   $p = 0.0223$ ; Bonferroni's multiple comparisons test, \* $p < 0.05$ , \*\* $p < 0.001$ ; PV cells:  $n = 11 TscI^{Ctrl}$ ,  $n = 14 Tg(Nkx2.1-Cre); TscI^{flox/flox}$ ,  $n = 7 TscI^{Ctrl} + Rapamycin$ ,  $n = 7 Tg(Nkx2.1-Cre); TscI^{flox/flox} + Rapamycin$ ). Arrowheads indicate boutons. Scale bars: **a1-d2**, 10  $\mu m$ ; and **a3-d3**, 5  $\mu m$ . Data represent mean  $\pm$  SEM.



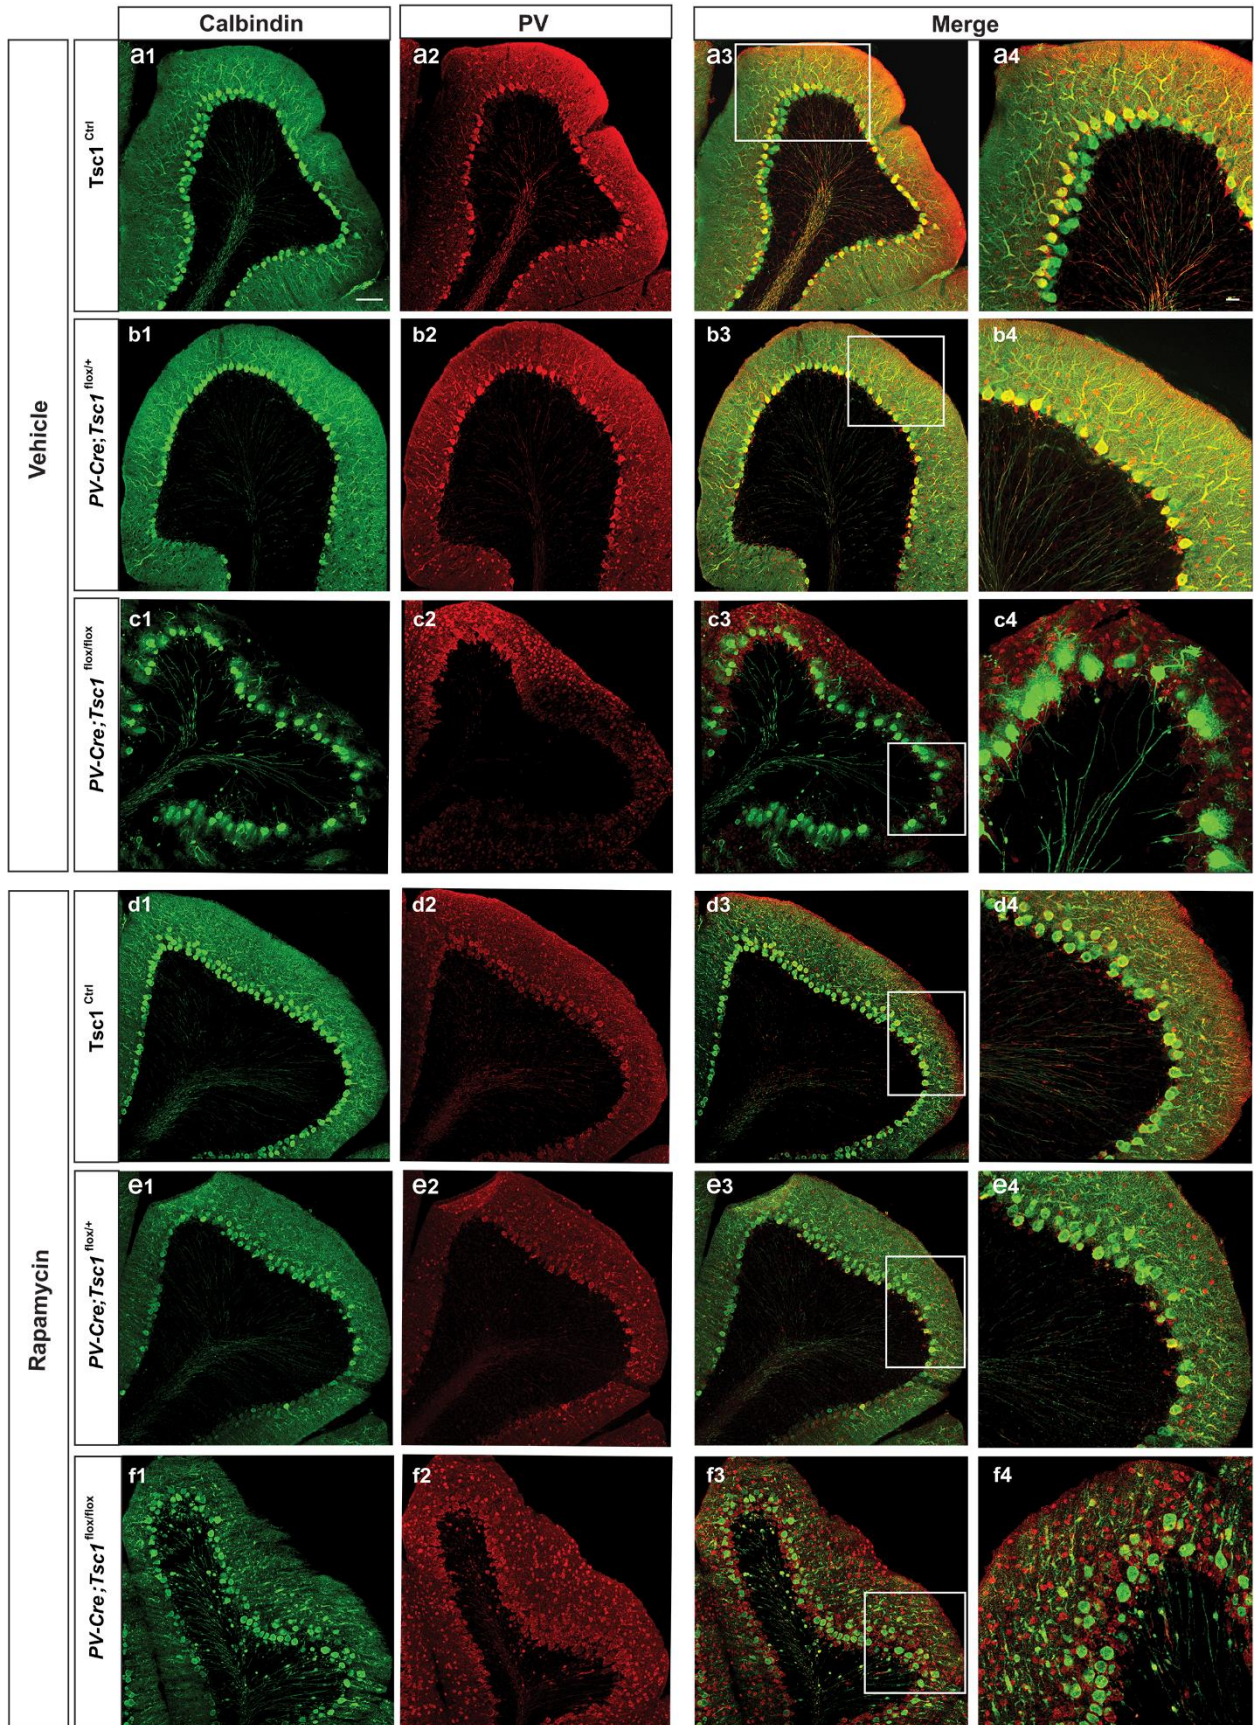

**Supplementary Figure 11. Short term Rapamycin treatment does not rescue cerebellar abnormalities in adult homozygous mutant mice.** Coronal sections of cerebellar cortex immunostained for Calbindin (green) and PV (red) in Vehicle treated *Tsc1<sup>Ctrl</sup>* mice (**a1-a4**), *PV-Cre;Tsc1<sup>lox/+</sup>* mice (**b1-b4**), *PV-Cre;Tsc1<sup>lox/lox</sup>* mice (**c1-c4**) and Rapamycin treated *Tsc1<sup>Ctrl</sup>* mice (**d1-d4**), *PV-Cre;Tsc1<sup>lox/+</sup>* mice (**e1-e4**), *PV-Cre;Tsc1<sup>lox/lox</sup>* mice (**f1-f4**). Note that we did not observe any obvious abnormality in *PV-Cre;Tsc1<sup>lox/+</sup>* mice, while the *PV-Cre;Tsc1<sup>lox/lox</sup>* mice were significantly affected and the rescue with rapamycin treatment was only partial (**f4**). Scale bars: **a1-f3**, 10  $\mu\text{m}$ ; and **a4-f4**, 5  $\mu\text{m}$ .
